# Supplementary material for: Iron-rich Oklahoma clays as a natural source of chromium in monitoring wells
Source: Royal Society of Chemistry journal article supplement (doi:10.1039/c1em10608b), 2011-01-01
Supplement: c1em10608b.pdf [file c1em10608b.pdf]

## Supplementary Material

### Filtered Sediment from Well 2-26A

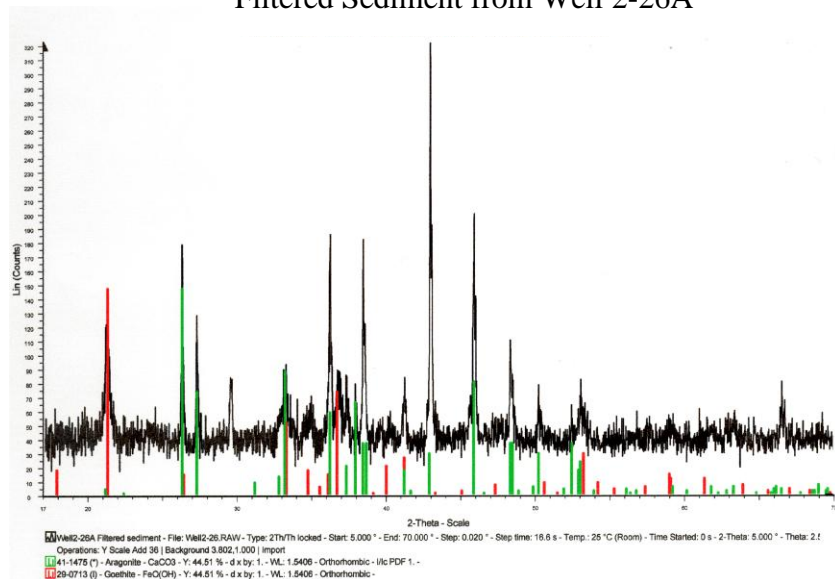

### Filtered Sediment from Well 70

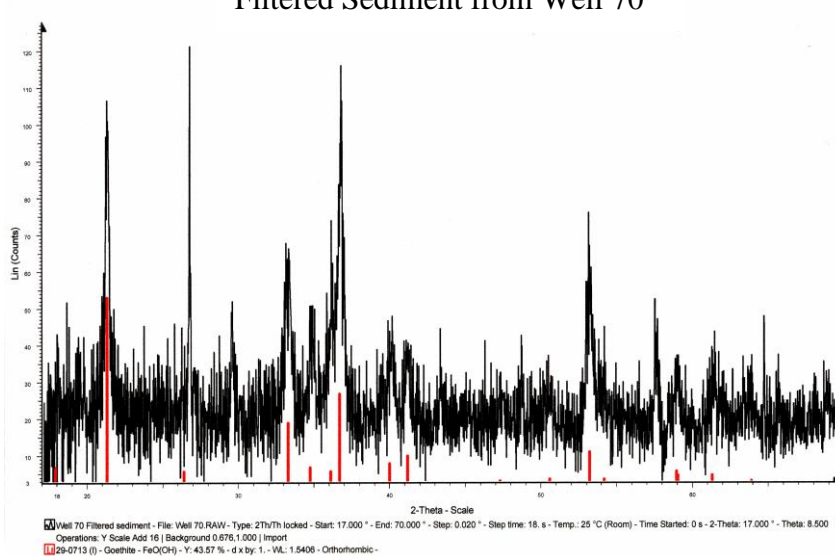

Supplementary Figure 1: XRD scan of solids obtained from Wells 2-26A (Top) and 70 (bottom). The material from Well 2-26A is a mixture of aragonite (CaCO<sub>3</sub>) and goethite (FeO(OH)) while Well 70 contains primarily goethite. Green lines are from the aragonite, while red lines are for the goethite.
